# Supplementary material
Source: PubMed Central journal article supplement (PMC3966529)
Supplement: ci4005332_si_001.pdf [file ci4005332_si_001.pdf]

# SUPPORTING INFORMATION

## HADDOCK<sub>2P2I</sub>: A biophysical model for predicting the binding affinity of protein-protein interaction inhibitors

*Panagiotis L. Kastritis, João P.G.L.M. Rodrigues, Alexandre M. J. J. Bonvin\**

Bijvoet Center for Biomolecular Research, Faculty of Science/Chemistry, Utrecht University,  
Utrecht, 3584CH, The Netherlands.

Corresponding Author

\* Prof. Dr. Alexandre M. J. J. Bonvin, Computational Structural Biology Group, Bijvoet Center  
for Biomolecular Research, Faculty of Science – Chemistry, Utrecht University, Padualaan 8,  
3584 CH Utrecht, The Netherlands, E-mail: a.m.j.j.bonvin@uu.nl. Telephone: +31302533859.  
Fax: +31302537623.

Table S1. Binding affinity dataset of protein-protein interaction inhibitors

| Interaction                                   | Biological role                 | PDB<br>(complex) | $K_d$ (complex) (M)            |
|-----------------------------------------------|---------------------------------|------------------|--------------------------------|
| <b>BclXL/Bak</b>                              | <b>Programmed Cell Death</b>    | <b>1bxl</b>      | <b>3.40E-7<sup>1</sup></b>     |
| Modulator (common name)                       | Formula                         | PDB<br>(complex) | $K_i$    $K_d$ (modulator) (M) |
| N3B                                           | $C_{27}H_{22}FN_3O_5S_2$        | 1ysi             | 1.2E-7 <sup>2</sup>            |
| ABT-737                                       | $C_{42}H_{45}ClN_6O_5S_2$       | 2yxj             | 5.0E-10 <sup>2</sup>           |
| 4FC (4'-fluoro-1,1'-biphenyl-4-carboxyl acid) | $C_{13}H_9FO_2$                 | 1ysg             | 3.0E-5 <sup>2</sup>            |
| TN1 (5,6,7,8-tetrahydronaphthalen-1-ol)       | $C_{10}H_{12}O$                 | 1ysg             | 4.3E-3 <sup>2</sup>            |
| acyl-sulfonamide-based ligand                 | $C_{30}H_{36}N_4O_5S_2$         | 2o22             | 6.7E-8 <sup>3</sup>            |
| W1191542                                      | $C_{42}H_{46}N_6O_5S_2$         | 3inq             | 1.1E-8 <sup>4</sup>            |
| Interaction                                   | Biological role                 | PDB<br>(complex) | $K_d$ (complex) (M)            |
| <b>MDM2/p53</b>                               | <b>Transcription regulation</b> | <b>1ycr</b>      | <b>6.00E-7<sup>5</sup></b>     |
| Modulator (common name)                       | Formula                         | PDB<br>(complex) | $K_i$    $K_d$ (modulator) (M) |
| HDM2                                          | $C_{23}H_{15}Cl_2IN_2O_4$       | 1t4e             | 8.0E-8 <sup>6</sup>            |
| WK23                                          | $C_{25}H_{17}Cl_2N_3O_2$        | 3lbk             | 9.2E-7 <sup>7</sup>            |
| MI-63                                         | $C_{29}H_{35}Cl_2FN_4O_3$       | 3lbl             | 3.6E-8 <sup>7</sup>            |
| Interaction                                   | Biological role                 | PDB<br>(complex) | $K_d$ (complex) (M)            |
| <b>XIAP-BIR3/CASPASE-9</b>                    | <b>Programmed Cell Death</b>    | <b>1nw9</b>      | <b>2.0E-8<sup>8</sup></b>      |
| Modulator (common name)                       | Formula                         | PDB<br>(complex) | $K_i$    $K_d$ (modulator) (M) |
| 998                                           | $C_{25}H_{38}N_4O_3$            | 1tfq             | 1.2E-8 <sup>9</sup>            |
| 997                                           | $C_{31}H_{42}N_4O_4$            | 1tft             | 5.0E-9 <sup>9</sup>            |
| 9JZ                                           | $C_{28}H_{38}N_6O_3$            | 3hl5             | 3.4E-5 <sup>10</sup>           |
| Interaction                                   | Biological role                 | PDB<br>(complex) | $K_d$ (complex) (M)            |
| <b>XIAP-BIR3/SMAC</b>                         | <b>Programmed Cell Death</b>    | <b>1g73</b>      | <b>4.2E-7<sup>8</sup></b>      |
| Modulator (common name)                       | Formula                         | PDB<br>(complex) | $K_i$    $K_d$ (modulator) (M) |
| BI6                                           | $C_{29}H_{34}N_4O_3$            | 2jk7             | 6.7E-8 <sup>11</sup>           |
| AoxSPW                                        | $C_{22}H_{25}N_5O_5$            | 2opy             | 3.0E-5 <sup>12</sup>           |
| Smac005                                       | $C_{28}H_{36}N_4O_4$            | 3clx             | 1.2E-7 <sup>13</sup>           |
| Smac005                                       | $C_{28}H_{36}N_4O_4$            | 3cm7             | 1.2E-7 <sup>13</sup>           |
| Smac010                                       | $C_{28}H_{37}N_5O_3$            | 3cm2             | 4.2E-7 <sup>13</sup>           |
| Smac037                                       | $C_{29}H_{39}N_5O_3$            | 3eyl             | 2.2E-7 <sup>14</sup>           |
| CZ3                                           | $C_{46}H_{60}N_{14}O_6S_2$      | 3g76             | 2.3E-7 <sup>15</sup>           |
| Interaction                                   | Biological role                 | PDB              | $K_d$ (complex) (M)            |

|                         |                                                       |                  |                                            |
|-------------------------|-------------------------------------------------------|------------------|--------------------------------------------|
| <b>ZipA/FtsZ</b>        | <b>Cell Cycle Regulation<br/>/ Cellular structure</b> | <b>1f47</b>      | <b>2.0E-5<sup>16</sup></b>                 |
| Modulator (common name) | Formula                                               | PDB<br>(complex) | $K_i$    $K_d$ (modulator)<br>( <i>M</i> ) |
| WAI                     | $C_{22}H_{26}ClN_7$                                   | 1y2f             | $1.2E-5^{17}$                              |
| CL3                     | $C_{22}H_{26}ClN_7$                                   | 1y2g             | $8.3E-5^{17}$                              |
| Interaction             | Biological role                                       | PDB<br>(complex) | $K_d$ (complex) ( <i>M</i> )               |
| <b>HPV-E2/E1</b>        | <b>Viral infection</b>                                | <b>1tue</b>      | <b>n/d</b>                                 |
| Modulator (common name) | Formula                                               | PDB<br>(complex) | $K_i$    $K_d$ (modulator)<br>( <i>M</i> ) |
| BILH 434                | $C_{29}H_{19}Cl_2N_3O_6S$                             | 1r6n             | $4.0E-8^{18}$                              |
| Interaction             | Biological role                                       | PDB<br>(complex) | $K_d$ (complex) ( <i>M</i> )               |
| <b>IL-2/IL-2R</b>       | <b>Immune system<br/>regulation</b>                   | <b>1z92</b>      | <b>1.0E-8<sup>19</sup></b>                 |
| Modulator (common name) | Formula                                               | PDB<br>(complex) | $K_i$    $K_d$ (modulator)<br>( <i>M</i> ) |
| FRG                     | $C_{26}H_{30}N_4O_3$                                  | 1m48             | $2.2E-5^{20}$                              |
| FRB                     | $C_{25}H_{33}Cl_2N_7O_2$                              | 1pw6             | $7.0E-6^{21}$                              |
| SP-1985                 | $C_{30}H_{35}N_5O_6$                                  | 1m49             | $7.5E-6^{22}$                              |
| FRH                     | $C_{30}H_{37}Cl_2N_7O_6$                              | 1py2             | $1.0E-7^{23}$                              |
| SP-4160                 | $C_{33}H_{42}Cl_2N_8O_4$                              | 1qvn             | $1.4E-6^{21}$                              |

**Table S2.** Different weighting and optimization schemes for binding affinity prediction of PPIs

using the HADDOCK score

| REGRESSION COEFFICIENTS <sup>a</sup> FOR MODELS using PRODRG parameters |                 |                                   |                                    |                                      |                                   |                                 |                                |                                                  |
|-------------------------------------------------------------------------|-----------------|-----------------------------------|------------------------------------|--------------------------------------|-----------------------------------|---------------------------------|--------------------------------|--------------------------------------------------|
| MODEL N                                                                 | HS <sup>b</sup> | VDW <sup>c</sup><br>( $\beta_1$ ) | ELEC <sup>d</sup><br>( $\beta_2$ ) | DESOLV <sup>e</sup><br>( $\beta_3$ ) | BSA <sup>f</sup><br>( $\beta_4$ ) | CONST <sup>g</sup><br>( $c_i$ ) | TRAINING SET (r <sup>2</sup> ) | CV-set <sup>h</sup><br>(4fold) (r <sup>2</sup> ) |
| 1                                                                       | -0.05           | 0                                 | 0                                  | 0                                    | 0                                 | 3.72                            | 0.40                           | 0.31                                             |
| 2                                                                       | 0               | -0.11                             | 0                                  | 0                                    | 0                                 | 2.82                            | 0.37                           | 0.35                                             |
| 3                                                                       | 0               | 0                                 | -0.007                             | 0                                    | 0                                 | 5.6                             | 0.07                           | 0.00                                             |
| 4                                                                       | 0               | 0                                 | 0                                  | -0.05                                | 0                                 | 6.22                            | 0.13                           | 0.01                                             |
| 5                                                                       | 0               | 0                                 | 0                                  | 0                                    | 0.006                             | 2.2                             | 0.50                           | 0.48                                             |
| 6                                                                       | 0               | 0.047                             | 0                                  | 0                                    | 0.008                             | 2.3                             | 0.52                           | 0.44                                             |
| 7                                                                       | 0               | 0                                 | -0.0055                            | 0                                    | 0.006                             | 1.74                            | 0.55                           | 0.53                                             |
| 8                                                                       | 0               | 0                                 | 0                                  | -0.01                                | 0.005                             | 2.4                             | 0.52                           | 0.45                                             |
| 9                                                                       | -0.02           | 0                                 | 0                                  | 0                                    | 0.004                             | 2.15                            | 0.55                           | 0.50                                             |
| 10                                                                      | 0               | 0.06                              | -0.006                             | 0                                    | 0.008                             | 1.82                            | 0.58                           | 0.52                                             |
| 11                                                                      | 0               | 0.04                              | 0                                  | -0.008                               | 0.007                             | 2.4                             | 0.52                           | 0.38                                             |
| <b>12</b>                                                               | <b>0</b>        | <b>0</b>                          | <b>-0.006</b>                      | <b>-0.018</b>                        | <b>0.005</b>                      | <b>1.99</b>                     | <b>0.57</b>                    | <b>0.53</b>                                      |
| 13                                                                      | 0               | 0.05                              | -0.006                             | -0.013                               | 0.007                             | 2                               | 0.58                           | 0.49                                             |
| 14                                                                      | 0               | -0.09                             | -0.006                             | -0.034                               | 0                                 | 2.74                            | 0.46                           | 0.38                                             |
| 15                                                                      | 0               | -0.11                             | -0.005                             | 0                                    | 0                                 | 2.47                            | 0.41                           | 0.36                                             |
| 16                                                                      | 0               | -0.1                              | 0                                  | -0.028                               | 0                                 | 3.11                            | 0.42                           | 0.32                                             |

| REGRESSION COEFFICIENTS <sup>a</sup> FOR MODELS using ACPYPE parameters |                 |                                   |                                    |                                      |                                   |                                 |                                |                                                  |
|-------------------------------------------------------------------------|-----------------|-----------------------------------|------------------------------------|--------------------------------------|-----------------------------------|---------------------------------|--------------------------------|--------------------------------------------------|
| MODEL N                                                                 | HS <sup>b</sup> | VDW <sup>c</sup><br>( $\beta_1$ ) | ELEC <sup>d</sup><br>( $\beta_2$ ) | DESOLV <sup>e</sup><br>( $\beta_3$ ) | BSA <sup>f</sup><br>( $\beta_4$ ) | CONST <sup>g</sup><br>( $c_i$ ) | TRAINING SET (r <sup>2</sup> ) | CV-set <sup>h</sup><br>(4fold) (r <sup>2</sup> ) |
| 1                                                                       | -0.04           | 0                                 | 0                                  | 0                                    | 0                                 | 4.18                            | 0.40                           | 0.37                                             |
| 2                                                                       | 0               | -0.09                             | 0                                  | 0                                    | 0                                 | 2.48                            | 0.53                           | 0.50                                             |
| 3                                                                       | 0               | 0                                 | -0.007                             | 0                                    | 0                                 | 5.86                            | 0.04                           | 0.00                                             |
| 4                                                                       | 0               | 0                                 | 0                                  | -0.03                                | 0                                 | 6.43                            | 0.07                           | 0.00                                             |
| 5                                                                       | 0               | 0                                 | 0                                  | 0                                    | 0.005                             | 2.17                            | 0.50                           | 0.49                                             |
| 6                                                                       | 0               | -0.07                             | 0                                  | 0                                    | 0.001                             | 2.35                            | 0.53                           | 0.49                                             |
| 7                                                                       | 0               | 0                                 | 0.003                              | 0                                    | 0.005                             | 2.15                            | 0.52                           | 0.48                                             |
| 8                                                                       | 0               | 0                                 | 0                                  | -0.004                               | 0.005                             | 2.26                            | 0.52                           | 0.42                                             |
| 9                                                                       | -0.003          | 0                                 | 0                                  | 0                                    | 0.005                             | 2.24                            | 0.50                           | 0.50                                             |
| 10                                                                      | 0               | -0.074                            | 0.004                              | 0                                    | 0.0013                            | 2.34                            | 0.53                           | 0.48                                             |
| 11                                                                      | 0               | -0.08                             | 0                                  | -0.01                                | 0.0005                            | 2.59                            | 0.53                           | 0.45                                             |
| 12                                                                      | 0               | 0                                 | 0.003                              | -0.0006                              | 0.005                             | 2.17                            | 0.52                           | 0.40                                             |
| 13                                                                      | 0               | -0.08                             | 0.003                              | -0.007                               | 0.0008                            | 2.5                             | 0.55                           | 0.40                                             |
| 14                                                                      | 0               | -0.1                              | -0.003                             | -0.008                               | 0                                 | 2.6                             | 0.53                           | 0.45                                             |
| 15                                                                      | 0               | -0.1                              | 0.004                              | 0                                    | 0                                 | 2.47                            | 0.53                           | 0.52                                             |
| 16                                                                      | 0               | -0.09                             | 0                                  | -0.01                                | 0                                 | 2.65                            | 0.53                           | 0.48                                             |

(a) A zero indicates that the respective term was not included in least-squares fitting. (b) Haddock score. (c) van der Waals component of Haddock score (d) Electrostatic interaction energy (e) Desolvation energy (f) Buried surface area (g) a constant term. Bold entry indicates best performing model overall (HADDOCK<sub>2P21</sub>). (h) CV-set: Cross-validation set.

**Table S3.** Small molecule compounds with two or more associated IC50 data, extracted from iPPI-DB.

| Compound<br>iPPI-DB AC | Protein A | Protein B | Method 1                         | pIC50 | Method 2                                 | pIC50 |
|------------------------|-----------|-----------|----------------------------------|-------|------------------------------------------|-------|
| 1603                   | BRD2      | H4        | FP                               | 6.10  | FRET                                     | 7.49  |
| 1605                   | BRD2      | H4        | FP                               | 5.00  | TR-FRET                                  | 5.70  |
| 1612                   | BRD2      | H4        | FP                               | 5.00  | TR-FRET                                  | 5.60  |
| 1634                   | BRD2      | H4        | FP                               | 5.20  | TR-FRET                                  | 5.80  |
| 1606                   | BRD2      | H4        | FP                               | 5.30  | TR-FRET                                  | 5.80  |
| 1639                   | BRD2      | H4        | FP                               | 4.50  | TR-FRET                                  | 5.00  |
| 1623                   | BRD2      | H4        | FP                               | 4.90  | TR-FRET                                  | 5.30  |
| 1607                   | BRD2      | H4        | FP                               | 5.40  | TR-FRET                                  | 5.70  |
| 1647                   | BRD2      | H4        | FP                               | 5.50  | TR-FRET                                  | 5.80  |
| 1615                   | BRD2      | H4        | FP                               | 5.30  | TR-FRET                                  | 5.60  |
| 1603                   | BRD3      | H4        | FP                               | 6.40  | FRET                                     | 7.37  |
| 1605                   | BRD3      | H4        | FP                               | 5.20  | TR-FRET                                  | 5.60  |
| 1612                   | BRD3      | H4        | FP                               | 5.40  | TR-FRET                                  | 5.70  |
| 1615                   | BRD3      | H4        | FP                               | 5.40  | TR-FRET                                  | 5.70  |
| 1606                   | BRD3      | H4        | FP                               | 5.70  | TR-FRET                                  | 6.00  |
| 1639                   | BRD3      | H4        | FP                               | 5.00  | TR-FRET                                  | 5.20  |
| 1634                   | BRD3      | H4        | FP                               | 5.80  | TR-FRET                                  | 6.00  |
| 1607                   | BRD3      | H4        | FP                               | 5.80  | TR-FRET                                  | 5.90  |
| 1623                   | BRD3      | H4        | FP                               | 5.30  | TR-FRET                                  | 5.40  |
| 1647                   | BRD3      | H4        | FP                               | 6.00  | TR-FRET                                  | 5.90  |
| 1604 <sup>a</sup>      | BRD4      | H4        | FP                               | 6.10  | MLL-fusion<br>leukaemic<br>proliferation | 7.59  |
| 1603 <sup>b</sup>      | BRD4      | H4        | LPS-stimulated<br>IL6 production | 5.80  | FRET                                     | 7.44  |
| 1602                   | BRD4      | H4        | alpha_screen                     | 7.11  | cellular viability                       | 8.40  |
| 1605                   | BRD4      | H4        | LPS-stimulated<br>IL6 production | 4.90  | TR-FRET                                  | 5.70  |
| 1606 <sup>c</sup>      | BRD4      | H4        | FP                               | 5.70  | TR-FRET                                  | 6.00  |
| 1634 <sup>d</sup>      | BRD4      | H4        | FP                               | 5.50  | TR-FRET                                  | 5.80  |
| 1623                   | BRD4      | H4        | FP                               | 4.90  | TR-FRET                                  | 5.20  |
| 1639 <sup>e</sup>      | BRD4      | H4        | FP                               | 4.70  | TR-FRET                                  | 5.00  |
| 1615                   | BRD4      | H4        | FP                               | 5.30  | TR-FRET                                  | 5.50  |
| 1612 <sup>f</sup>      | BRD4      | H4        | FP                               | 5.20  | TR-FRET                                  | 5.30  |
| 1647 <sup>g</sup>      | BRD4      | H4        | FP                               | 5.50  | TR-FRET                                  | 5.60  |
| 1607 <sup>h</sup>      | BRD4      | H4        | FP                               | 5.50  | TR-FRET                                  | 5.50  |
| 20                     | IL2       | IL2R      | SPR                              | 6.70  | ELISA                                    | 6.70  |
| cmpnd5 <sup>i</sup>    | LFA-1     | ICAM      | HUVEC                            | 8.60  | MLR                                      | 7.20  |
| cmpnd2 <sup>i</sup>    | LFA-1     | ICAM      | HUVEC                            | 8.00  | MLR                                      | 6.70  |
| cmpnd1 <sup>i</sup>    | LFA-1     | ICAM      | HUVEC                            | 7.70  | MLR                                      | 6.60  |
| cmpnd4 <sup>i</sup>    | LFA-1     | ICAM      | HUVEC                            | 7.90  | MLR                                      | 6.85  |
| cmpnd3 <sup>i</sup>    | LFA-1     | ICAM      | HUVEC                            | 8.00  | MLR                                      | 7.10  |
| 1278 <sup>i</sup>      | MDM2      | P53       | FP                               | 4.71  | FP                                       | 6.72  |
| 1449 <sup>k</sup>      | MDM2      | P53       | FP                               | 7.55  | proliferation assay                      | 4.85  |
| 1143                   | MDM2      | P53       | ELISA                            | 5.00  | proliferation assay                      | 6.8   |
| 1282 <sup>l</sup>      | MDM2      | P53       | proliferation assay              | 4.98  | proliferation assay                      | 6.11  |
| 945 <sup>m</sup>       | MDM2      | P53       | FP                               | 6.43  | proliferation assay                      | 4.78  |
| 595 <sup>n</sup>       | MDM2      | P53       | FP                               | 5.69  | proliferation assay                      | 4.40  |
| 541                    | MDM2      | P53       | ELISA                            | 5.00  | proliferation assay                      | 6.20  |

|                   |      |      |                     |      |                     |      |
|-------------------|------|------|---------------------|------|---------------------|------|
| 682 <sup>o</sup>  | MDM2 | P53  | proliferation assay | 4.51 | proliferation assay | 4.77 |
| 392 <sup>p</sup>  | MDM2 | P53  | proliferation assay | 4.51 | proliferation assay | 5.13 |
| 1091 <sup>q</sup> | MDM2 | P53  | ELISA               | 7.52 | proliferation assay | 8.00 |
| 1249 <sup>f</sup> | MDM2 | P53  | ELISA               | 6.00 | proliferation assay | 6.70 |
| 989               | MDM2 | P53  | ELISA               | 7.00 | proliferation assay | 8.00 |
| 706 <sup>s</sup>  | MDM2 | P53  | FP                  | 5.23 | proliferation assay | 4.76 |
| 149               | MDM2 | P53  | ELISA               | 7.00 | proliferation assay | 7.70 |
| 872               | MDM2 | P53  | ELISA               | 6.52 | proliferation assay | 7.20 |
| 1548              | MDM2 | P53  | ELISA               | 6.52 | proliferation assay | 7.20 |
| 1534              | MDM2 | P53  | ELISA               | 7.00 | proliferation assay | 7.60 |
| 255               | MDM2 | P53  | ELISA               | 5.52 | proliferation assay | 6.04 |
| 1357              | MDM2 | P53  | ELISA               | 5.00 | proliferation assay | 5.49 |
| 994               | MDM2 | P53  | ELISA               | 5.52 | proliferation assay | 5.15 |
| 1465              | MDM2 | P53  | ELISA               | 6.00 | proliferation assay | 5.64 |
| 1161              | MDM2 | P53  | ELISA               | 6.52 | proliferation assay | 6.80 |
| 888               | MDM2 | P53  | ELISA               | 5.00 | proliferation assay | 5.19 |
| 295               | MDM2 | P53  | ELISA               | 5.52 | proliferation assay | 5.36 |
| 1475              | MDM2 | P53  | ELISA               | 6.00 | proliferation assay | 5.85 |
| 1539              | MDM2 | P53  | ELISA               | 5.52 | proliferation assay | 5.66 |
| 433               | MDM2 | P53  | ELISA               | 5.52 | proliferation assay | 5.50 |
| 1182              | MDM2 | P53  | ELISA               | 5.52 | proliferation assay | 5.50 |
| 701               | MDM2 | P53  | ELISA               | 4.84 | ELISA               | 4.85 |
| 414               | MDM2 | P53  | ELISA               | 7.00 | proliferation assay | 7.00 |
| 985               | MDM2 | P53  | ELISA               | 4.79 | ELISA               | 4.79 |
| 1150              | MDM2 | P53  | ELISA               | 5.28 | ELISA               | 5.28 |
| 472               | XIAP | SMAC | FP                  | 6.01 | proliferation assay | 5.22 |
| 1179              | XIAP | SMAC | FP                  | 6.63 | FP                  | 6.48 |

<sup>a</sup>also: MLL-AF9-fusion leukaemic proliferation;6.24 MLL-ENL-fusion leukaemic proliferation;6.38 MLL-fusion leukaemic proliferation;6.92 MLL-fusion leukaemic proliferation;6.05 MLL-fusion leukaemic proliferation;4.6 LPS-stimulated IL6 production;6.8 MLL-fusion leukaemic proliferation;6 LPS-stimulated IL6 production;5.9 MLL-fusion leukaemic proliferation;7.82 MLL-fusion leukaemic proliferation;6.72 LPS-stimulated IL6 production;5.9.

<sup>b</sup>also: LPS-stimulated IL6 production;6.2 LPS-stimulated IL6 production;6.7

<sup>c</sup>also: LPS-stimulated IL6 production;5.5

<sup>d</sup>also: LPS-stimulated IL6 production;5.6

<sup>e</sup>also: LPS-stimulated IL6 production;4.8

<sup>f</sup>also: LPS-stimulated IL6 production;5.1

<sup>g</sup>also: LPS-stimulated IL6 production;5.5

<sup>h</sup>also: LPS-stimulated IL6 production;5.5

<sup>i</sup>affinity data retrieved from Pubmed id: 20405922

<sup>j</sup>also: TR-FRET;7.82

<sup>k</sup>also: proliferation assay;6.3

<sup>l</sup>also: proliferation assay;5.85

FP;6.66

<sup>m</sup>also: proliferation assay;5.42

proliferation assay;5.76

<sup>n</sup>also: proliferation assay;5.37

<sup>o</sup>also: proliferation assay;5.68

<sup>p</sup>also: proliferation assay;5.54

<sup>q</sup>also: ELISA;7 ELISA;7.52

<sup>r</sup>also: ELISA;7

<sup>s</sup>also: proliferation assay;5.44

proliferation assay;5.49

## SUPPORTING REFERENCES

- (1) Muchmore, S. W.; Sattler, M.; Liang, H.; Meadows, R. P.; Harlan, J. E.; Yoon, H. S.; Nettlesheim, D.; Chang, B. S.; Thompson, C. B.; Wong, S. L.; Ng, S. L.; Fesik, S. W. X-ray and NMR structure of human Bcl-xL, an inhibitor of programmed cell death. *Nature* **1996**, *381*, 335-341.
- (2) Oltersdorf, T.; Elmore, S. W.; Shoemaker, A. R.; Armstrong, R. C.; Augeri, D. J.; Belli, B. A.; Bruncko, M.; Deckwerth, T. L.; Dinges, J.; Hajduk, P. J.; Joseph, M. K.; Kitada, S.; Korsmeyer, S. J.; Kunzer, A. R.; Letai, A.; Li, C.; Mitten, M. J.; Nettlesheim, D. G.; Ng, S.; Nimmer, P. M.; O'Connor, J. M.; Oleksijew, A.; Petros, A. M.; Reed, J. C.; Shen, W.; Tahir, S. K.; Thompson, C. B.; Tomaselli, K. J.; Wang, B.; Wendt, M. D.; Zhang, H.; Fesik, S. W.; Rosenberg, S. H. An inhibitor of Bcl-2 family proteins induces regression of solid tumours. *Nature* **2005**, *435*, 677-681.
- (3) Bruncko, M.; Oost, T. K.; Belli, B. A.; Ding, H.; Joseph, M. K.; Kunzer, A.; Martineau, D.; McClellan, W. J.; Mitten, M.; Ng, S. C.; Nimmer, P. M.; Oltersdorf, T.; Park, C. M.; Petros, A. M.; Shoemaker, A. R.; Song, X.; Wang, X.; Wendt, M. D.; Zhang, H.; Fesik, S. W.; Rosenberg, S. H.; Elmore, S. W. Studies leading to potent, dual inhibitors of Bcl-2 and Bcl-xL. *J. Med. Chem.* **2007**, *50*, 641-662.
- (4) Lee, E. F.; Czabotar, P. E.; Yang, H.; Sleebs, B. E.; Lessene, G.; Colman, P. M.; Smith, B. J.; Fairlie, W. D. Conformational changes in Bcl-2 pro-survival proteins determine their capacity to bind ligands. *J. Biol. Chem.* **2009**, *284*, 30508-30517.
- (5) Kussie, P. H.; Gorina, S.; Marechal, V.; Elenbaas, B.; Moreau, J.; Levine, A. J.; Pavletich, N. P. Structure of the MDM2 oncoprotein bound to the p53 tumor suppressor transactivation domain. *Science* **1996**, *274*, 948-953.
- (6) Grasberger, B. L.; Lu, T.; Schubert, C.; Parks, D. J.; Carver, T. E.; Koblisch, H. K.; Cummings, M. D.; LaFrance, L. V.; Milkiewicz, K. L.; Calvo, R. R.; Maguire, D.; Lattanze, J.; Franks, C. F.; Zhao, S.; Ramachandren, K.; Bylebyl, G. R.; Zhang, M.; Manthey, C. L.; Petrella, E. C.; Pantoliano, M. W.; Deckman, I. C.; Spurlino, J. C.; Maroney, A. C.; Tomczuk, B. E.; Molloy, C. J.; Bone, R. F. Discovery and cocrystal structure of benzodiazepinedione HDM2 antagonists that activate p53 in cells. *J. Med. Chem.* **2005**, *48*, 909-912.
- (7) Popowicz, G. M.; Czarna, A.; Wolf, S.; Wang, K.; Wang, W.; Domling, A.; Holak, T. A. Structures of low molecular weight inhibitors bound to MDMX and MDM2 reveal new approaches for p53-MDMX/MDM2 antagonist drug discovery. *Cell Cycle* **2010**, *9*, 1104-1111.
- (8) Wu, G.; Chai, J.; Suber, T. L.; Wu, J. W.; Du, C.; Wang, X.; Shi, Y. Structural basis of IAP recognition by Smac/DIABLO. *Nature* **2000**, *408*, 1008-1012.
- (9) Oost, T. K.; Sun, C.; Armstrong, R. C.; Al-Assaad, A. S.; Betz, S. F.; Deckwerth, T. L.; Ding, H.; Elmore, S. W.; Meadows, R. P.; Olejniczak, E. T.; Oleksijew, A.; Oltersdorf, T.; Rosenberg, S. H.; Shoemaker, A. R.; Tomaselli, K. J.; Zou, H.; Fesik, S. W. Discovery of potent antagonists of the antiapoptotic protein XIAP for the treatment of cancer. *J. Med. Chem.* **2004**, *47*, 4417-4426.
- (10) Ndubaku, C.; Varfolomeev, E.; Wang, L.; Zobel, K.; Lau, K.; Elliott, L. O.; Maurer, B.; Fedorova, A. V.; Dynek, J. N.; Koehler, M.; Hymowitz, S. G.; Tsui, V.; Deshayes, K.; Fairbrother, W. J.; Flygare, J. A.; Vucic, D. Antagonism of c-IAP and XIAP proteins is

- required for efficient induction of cell death by small-molecule IAP antagonists. *ACS Chem. Biol.* **2009**, *4*, 557-566.
- (11) Sun, H.; Stuckey, J. A.; Nikolovska-Coleska, Z.; Qin, D.; Meagher, J. L.; Qiu, S.; Lu, J.; Yang, C. Y.; Saito, N. G.; Wang, S. Structure-based design, synthesis, evaluation, and crystallographic studies of conformationally constrained Smac mimetics as inhibitors of the X-linked inhibitor of apoptosis protein (XIAP). *J. Med. Chem.* **2008**, *51*, 7169-7180.
- (12) Wist, A. D.; Gu, L.; Riedl, S. J.; Shi, Y.; McLendon, G. L. Structure-activity based study of the Smac-binding pocket within the BIR3 domain of XIAP. *Bioorg. Med. Chem.* **2007**, *15*, 2935-2943.
- (13) Mastrangelo, E.; Cossu, F.; Milani, M.; Sorrentino, G.; Lecis, D.; Delia, D.; Manzoni, L.; Drago, C.; Seneci, P.; Scolastico, C.; Rizzo, V.; Bolognesi, M. Targeting the X-linked inhibitor of apoptosis protein through 4-substituted azabicyclo[5.3.0]alkane smac mimetics. Structure, activity, and recognition principles. *J. Mol. Biol.* **2008**, *384*, 673-689.
- (14) Nikolovska-Coleska, Z.; Wang, R.; Fang, X.; Pan, H.; Tomita, Y.; Li, P.; Roller, P. P.; Krajewski, K.; Saito, N. G.; Stuckey, J. A.; Wang, S. Development and optimization of a binding assay for the XIAP BIR3 domain using fluorescence polarization. *Anal. Biochem.* **2004**, *332*, 261-273.
- (15) Cossu, F.; Milani, M.; Mastrangelo, E.; Vachette, P.; Servida, F.; Lecis, D.; Canevari, G.; Delia, D.; Drago, C.; Rizzo, V.; Manzoni, L.; Seneci, P.; Scolastico, C.; Bolognesi, M. Structural basis for bivalent Smac-mimetics recognition in the IAP protein family. *J. Mol. Biol.* **2009**, *392*, 630-644.
- (16) Moy, F. J.; Glasfeld, E.; Mosyak, L.; Powers, R. Solution structure of ZipA, a crucial component of Escherichia coli cell division. *Biochemistry* **2000**, *39*, 9146-9156.
- (17) Rush, T. S., 3rd; Grant, J. A.; Mosyak, L.; Nicholls, A. A shape-based 3-D scaffold hopping method and its application to a bacterial protein-protein interaction. *J. Med. Chem.* **2005**, *48*, 1489-1495.
- (18) Wang, Y.; Coulombe, R.; Cameron, D. R.; Thauvette, L.; Massariol, M. J.; Amon, L. M.; Fink, D.; Titolo, S.; Welchner, E.; Yoakim, C.; Archambault, J.; White, P. W. Crystal structure of the E2 transactivation domain of human papillomavirus type 11 bound to a protein interaction inhibitor. *J. Biol. Chem.* **2004**, *279*, 6976-6985.
- (19) Rickert, M.; Wang, X.; Boulanger, M. J.; Goriatcheva, N.; Garcia, K. C. The structure of interleukin-2 complexed with its alpha receptor. *Science* **2005**, *308*, 1477-1480.
- (20) Arkin, M. R.; Randal, M.; DeLano, W. L.; Hyde, J.; Luong, T. N.; Oslob, J. D.; Raphael, D. R.; Taylor, L.; Wang, J.; McDowell, R. S.; Wells, J. A.; Braisted, A. C. Binding of small molecules to an adaptive protein-protein interface. *Proc. Natl. Acad. Sci. U S A* **2003**, *100*, 1603-1608.
- (21) Raimundo, B. C.; Oslob, J. D.; Braisted, A. C.; Hyde, J.; McDowell, R. S.; Randal, M.; Waal, N. D.; Wilkinson, J.; Yu, C. H.; Arkin, M. R. Integrating fragment assembly and biophysical methods in the chemical advancement of small-molecule antagonists of IL-2: an approach for inhibiting protein-protein interactions. *J. Med. Chem.* **2004**, *47*, 3111-3130.
- (22) Arkin, M.; Lear, J. D. A new data analysis method to determine binding constants of small molecules to proteins using equilibrium analytical ultracentrifugation with absorption optics. *Anal. Biochem.* **2001**, *299*, 98-107.



(23) Braisted, A. C.; Oslob, J. D.; Delano, W. L.; Hyde, J.; McDowell, R. S.; Waal, N.; Yu, C.; Arkin, M. R.; Raimundo, B. C. Discovery of a potent small molecule IL-2 inhibitor through fragment assembly. *J. Am. Chem. Soc.* **2003**, *125*, 3714-3715.
